# Supplementary material for: A clinical drug–drug interaction study to evaluate the effect of a proton-pump inhibitor, a combined P-glycoprotein/cytochrome 450 enzyme (CYP)3A4 inhibitor, and a CYP2C9 inhibitor on the pharmacokinetics of vismodegib
Source: PubMed Central journal article supplement (PMC4921109; doi:10.1007/s00280-016-3020-z), 2016-05-06
Supplement: 280_2016_3020_MOESM1_ESM.pdf [file 280_2016_3020_MOESM1_ESM.pdf]

**Supplemental Table 1** Baseline demographics

|                                               | Arm A<br>Vismodegib<br>(n = 22) | Arm B<br>Vismodegib<br>+ rabeprazole (n = 24) | Arm C<br>Vismodegib<br>+<br>itraconazole<br>(n = 22) | Arm D<br>Vismodegib<br>+<br>fluconazole<br>(n = 24) | Overall<br>(N = 92) |
|-----------------------------------------------|---------------------------------|-----------------------------------------------|------------------------------------------------------|-----------------------------------------------------|---------------------|
| Age, mean<br>(min, max),<br>years             | 55 (36, 68)                     | 59 (43, 70)                                   | 55 (41, 68)                                          | 57 (38, 68)                                         | 57 (36,<br>70)      |
| BMI, mean<br>(min, max),<br>kg/m <sup>2</sup> | 28 (21, 34)                     | 26 (20, 32)                                   | 28 (20, 34)                                          | 28 (22, 33)                                         | 27 (20,<br>34)      |
| Sex, n (%)                                    |                                 |                                               |                                                      |                                                     |                     |
| Female                                        | 22 (100)                        | 24 (100)                                      | 22 (100)                                             | 24 (100)                                            | 92 (100)            |
| Race, n (%)                                   |                                 |                                               |                                                      |                                                     |                     |
| Asian                                         | 0                               | 0                                             | 0                                                    | 1 (4.2)                                             | 1 (1.1)             |
| Black or<br>African<br>American               | 4 (18.2)                        | 5 (20.8)                                      | 7 (31.8)                                             | 7 (29.2)                                            | 23<br>(25.0)        |
| Multiple <sup>a</sup>                         | 1 (4.5)                         | 0                                             | 0                                                    | 0                                                   | 1 (1.1)             |
| White                                         | 17 (77.3)                       | 19 (79.2)                                     | 15 (68.2)                                            | 16 (66.7)                                           | 67<br>(72.8)        |
| Ethnicity, n<br>(%)                           |                                 |                                               |                                                      |                                                     |                     |
| Hispanic<br>or Latino                         | 7 (31.8)                        | 6 (25.0)                                      | 7 (31.8)                                             | 7 (29.2)                                            | 27<br>(29.3)        |
| Not<br>Hispanic<br>or Latino                  | 15 (68.2)                       | 18 (75.0)                                     | 15 (68.2)                                            | 17 (70.8)                                           | 65<br>(70.7)        |
| AAG,<br>geometric<br>mean<br>(CV%)            |                                 |                                               |                                                      |                                                     |                     |
| Low (0.5–<br>0.73 g/L)                        | 5 (22.7)                        | 5 (20.8)                                      | 5 (22.7)                                             | 6 (25.0)                                            | 21<br>(22.8)        |
| Medium<br>(0.74–<br>0.96 g/L)                 | 10 (45.5)                       | 12 (50.0)                                     | 10 (45.5)                                            | 11 (45.8)                                           | 43<br>(46.7)        |
| High<br>(0.97–1.2<br>g/L)                     | 7 (31.8)                        | 7 (29.2)                                      | 7 (31.8)                                             | 7 (29.2)                                            | 28<br>(30.4)        |

AAG alpha-1-acid glycoprotein, *BMI* body mass index, *CV%* coefficient of variation

<sup>a</sup> Multiple = White and American Indian or Alaska Native

**Supplemental Table 2** Treatment-emergent AEs with incidence of  $\geq 4$  patients in the overall population

| AE (preferred term)  | Arm A<br>Vismodegib<br>( <i>n</i> = 22) | Arm B<br>Vismodegib<br>+<br>rabeprazole<br>( <i>n</i> = 24) | Arm C<br>Vismodegib<br>+<br>itraconazole<br>( <i>n</i> = 22) | Arm D<br>Vismodegib<br>+<br>fluconazole<br>( <i>n</i> = 24) | Overall<br>( <i>N</i> = 92) |
|----------------------|-----------------------------------------|-------------------------------------------------------------|--------------------------------------------------------------|-------------------------------------------------------------|-----------------------------|
| Headache             | 4 (18.2)                                | 3 (12.5)                                                    | 2 (9.1)                                                      | 3 (12.5)                                                    | 12 (13.0)                   |
| Constipation         | 4 (18.2)                                | 6 (25.0)                                                    | 0                                                            | 1 (4.2)                                                     | 11 (12.0)                   |
| Nausea               | 2 (9.1)                                 | 0                                                           | 3 (13.6)                                                     | 4 (16.7)                                                    | 9 (9.8)                     |
| Diarrhea             | 1 (4.5)                                 | 2 (8.3)                                                     | 4 (18.2)                                                     | 1 (4.2)                                                     | 8 (8.7)                     |
| Abdominal pain       | 1 (4.5)                                 | 1 (4.2)                                                     | 3 (13.6)                                                     | 2 (8.3)                                                     | 7 (7.6)                     |
| Pruritus             | 0                                       | 2 (8.3)                                                     | 3 (13.6)                                                     | 1 (4.2)                                                     | 6 (6.5)                     |
| Abdominal distention | 1 (4.5)                                 | 4 (16.7)                                                    | 0                                                            | 0                                                           | 5 (5.4)                     |
| Flatulence           | 1 (4.5)                                 | 2 (8.3)                                                     | 1 (4.5)                                                      | 0                                                           | 4 (4.3)                     |
| Dizziness            | 2 (9.1)                                 | 0                                                           | 2 (9.1)                                                      | 0                                                           | 4 (4.3)                     |
| Rash                 | 0                                       | 0                                                           | 3 (13.6)                                                     | 1 (4.2)                                                     | 4 (4.3)                     |
